# Supplementary material for: A signal-seeking Phase 2 study of olaparib and durvalumab in advanced solid cancers with homologous recombination repair gene alterations
Source: PubMed Central journal article supplement (PMC10403555; doi:10.1038/s41416-023-02311-0), 2023-06-26
Supplement: 41416_2023_2311_MOESM1_ESM.pdf [file 41416_2023_2311_MOESM1_ESM.pdf]

## Appendices

### Appendix 1. Biological correlates

#### A. Tumour mutational burden (TMB) methods

For the CCPv2/2.2 panel, sufficient information was not available to harmonise the TMB measures. Therefore, the 10 mutations/ megabase threshold was applied to the TMB value obtained from the CCPv2/2.2 assay. This identified only one high TMB (12.3 mutations/ megabase) amongst patients sequenced on this assay.

For TST170, the number of non-synonymous mutations/ megabase was calculated by normalising the WES-TMB value to 35 megabases according to method by Endris V et al (Int J Cancer. 2018), before further conversion to the FMI-equivalent.

**Supplementary Table 1.** Harmonisation of TMB measurements across sequencing panels

| Substudy Patient ID | Sequencing assay | TMB at time of study analysis (mut/Mb) | Adjusted FMI-equivalent TMB (mut/Mb) | Final TMB grouping across panels |
|---------------------|------------------|----------------------------------------|--------------------------------------|----------------------------------|
| D001                | CCPv2.2          | 7.6                                    | n/a                                  | L                                |
| D002                | CCPv2            | 12.3                                   | n/a                                  | H                                |
| D003                | CCPv2.2          | 2.5                                    | n/a                                  | L                                |
| D004                | TST170           | 2.3                                    | 4.3                                  | L                                |
| D005                | CCPv2            | 0                                      | n/a                                  | L                                |
| D006                | CCPv2.2          | 1.9                                    | n/a                                  | L                                |
| D007                | TST170           | 22.5                                   | 34.0                                 | H                                |
| D008                | TST170           | 0                                      | 0.9                                  | L                                |
| D009                | TST170           | 2.3                                    | 4.3                                  | L                                |
| D010                | CCPv2.2          | 0.6                                    | n/a                                  | L                                |
| D011                | CCPv2.2          | 0.6                                    | n/a                                  | L                                |
| D012                | TST170           | 18                                     | 27.4                                 | H                                |
| D013                | TST170           | 2.3                                    | 4.3                                  | L                                |
| D014                | CCPv2.2          | 1.3                                    | n/a                                  | L                                |
| D015                | TST170           | 0                                      | 0.9                                  | L                                |
| D016                | TST170           | 0                                      | 0.9                                  | L                                |
| D017                | TST170           | 0                                      | 0.9                                  | L                                |
| D018                | TST170           | 6.8                                    | 10.9                                 | H                                |
| D019                | TST170           | 27                                     | 40.6                                 | H                                |
| D020                | TST170           | 0                                      | 0.9                                  | L                                |
| D021                | CCPv2            | 4.5                                    | n/a                                  | L                                |
| D022                | TST170           | 0                                      | 0.9                                  | L                                |

|      |                   |      |       |   |
|------|-------------------|------|-------|---|
| D023 | TST170            | 2.3  | 4.3   | L |
| D024 | TST170            | 0    | 0.9   | L |
| D025 | TST170            | 0    | 0.9   | L |
| D026 | TST170            | 117  | 172.9 | H |
| D027 | TST170            | 0    | 0.9   | L |
| D029 | TST170            | 0    | 0.9   | L |
| D030 | TST170            | 0    | 0.9   | L |
| D031 | TST170            | 0    | 0.9   | L |
| D032 | TST170            | 0    | 0.9   | L |
| D033 | TST170            | 6.8  | 10.9  | H |
| D034 | TST170            | 2.3  | 4.3   | L |
| D035 | TST170            | 4.5  | 7.6   | L |
| D036 | TST170            | 2.3  | 4.3   | L |
| D037 | CCPv2.2           | 7    | n/a   | L |
| D038 | Genomics for Life |      |       |   |
| D039 | TST170            |      |       |   |
| D040 | CCPv2             | 3.8  | n/a   | L |
| D041 | TST170            | 0    | 0.9   | L |
| D042 | TST170            | 4.5  | 7.6   | L |
| D043 | CCPv2.2           | 1.3  | 2.8   | L |
| D044 | TST170            | 6.8  | 10.9  | H |
| D045 | TST170            | 0    | 0.9   | L |
| D046 | TST170            | 2.3  | 4.3   | L |
| D047 | TST170            | 20.3 | 30.8  | H |
| D048 | TST170            | 6.8  | 10.9  | H |
| D049 | TST170            | 4.5  | 7.6   | L |

Shaded cells indicate unavailable data. **Abbreviations:** Muts/Mb – mutations per megabase.

## B. NanoString methods

Gene expression signatures required total RNA to be isolated from 4  $\mu$ M-thick FFPE scrolls using the RNeasy DPS FFPE kit (Qiagen), following the manufacturer's protocol. RNA was quantified using a Qubit fluorometer (Thermo Fisher). Gene expression analysis was performed using the NanoString nCounter expression platform (NanoString Technologies)<sup>1</sup>. A custom codeset of 128 genes, including 123 genes related to T-cell biology, inflammation, and immune response and 5 housekeeping genes was applied<sup>2-4</sup>. For each sample, 150 ng of RNA in a total volume of 5  $\mu$ l was mixed with 3' biotinylated capture probe and 5' reporter probe tagged with a fluorescent barcode. Probes and RNA were hybridized overnight at 65°C for 24 hours. Samples were run on a NanoString MAX preparation station, with removal of excess capture and reporter probes and loaded into the sample cartridge. Samples were scanned on the nCounter digital analyzer. Raw gene expression data was matched with the

Nanostring reference library file and then normalized using the Removing Unwanted Variation-III (RUV-III) method [1]. All statistical analyses have been performed in R (version 4.1) including data integration and visualisation using tidyverse (v 1.3.1), and survival analysis using survminer (v 0.4.9).

1. Molania R, Gagnon-Bartsch JA, Dobrovic A, Speed TP. A new normalization for Nanostring nCounter gene expression data. *Nucleic Acids Res.* 2019;47(12):6073-83. Epub 2019/05/23. doi: 10.1093/nar/gkz433. PubMed PMID: 31114909.
2. Ji, R. R. et al. An immune-active tumor microenvironment favors clinical response to ipilimumab. *Cancer immunology, immunotherapy: CII* 61, 1019-1031, doi:10.1007/s00262-011-1172-6 (2012).
3. Herbst, R. S. et al. Predictive correlates of response to the anti-PD-L1 antibody MPDL3280A in cancer patients. *Nature* 515, 563-567, doi:10.1038/nature14011 (2014).
4. Ayers, M. et al. Relationship between immune gene signatures and clinical response to PD-1 blockade with pembrolizumab (MK-3475) in patients with advanced solid tumors. *Journal for Immunotherapy of Cancer* 3, P80-P80, doi:10.1186/2051-1426-3-S2-P80 (2015).

## C. Optimised antibody panels

### Lymphoid+ panel

| #  | marker/reagent      | fluorophore          | clone      | source    | Phenotyping and state      |
|----|---------------------|----------------------|------------|-----------|----------------------------|
| 1  | FVS700              | -                    | -          | BD        |                            |
| -  | human Fc block      | -                    | -          | BD        |                            |
| 2  | CD3                 | Brilliant Violet-786 | UCHT1      | BD        | Total T-cells              |
| 3  | CD4                 | Brilliant UV-737     | SK3        | BD        | CD4+ T-cells               |
| 4  | CD8a                | Brilliant UV-395     | RPA-T8     | BD        | CD8+ T-cells               |
| 5  | CD14                | Brilliant Violet-650 | M5E2       | BD        | Monocyte subset macrophage |
| 6  | CD19                | Brilliant Violet-711 | SJ25C1     | BD        | Total B-cells              |
| 7  | CD56                | PE-Cy5               | B159       | BD        | NKT cells, T-cell subsets  |
| 8  | HLA-DR              | Brilliant Violet-605 | G46-6      | BD        | Activation                 |
| 9  | CD127               | Brilliant Violet-421 | HIL-7R-M21 | BD        | T-cell subsets             |
| 10 | CD45RA              | Brilliant Blue-515   | HI100      | BD        | Naïve memory cells         |
| 11 | PD-L1               | PE                   | MIH1       | BD        | Checkpoint                 |
| 12 | CCR7                | PE-CF594             | 150503     | BD        | CD197 (Naïve memory cells) |
| 13 | CD25                | PE-Cy7               | M-A251     | BD        | T-reg, activation          |
| 14 | Va24Ja18            | APC                  | 6B11       | BioLegend | TCR specific               |
| 15 | CD38                | APC-H7               | HB7        | BD        | Naïve /memory              |
| 16 | PD-1                | Brilliant Blue-700   | EH12.1     | BD        | Checkpoint                 |
| -  | TF Fixation Buffer  | -                    | -          | BD        |                            |
| -  | TF Perm/Wash buffer | -                    | -          | BD        |                            |
| 17 | Ki-67               | Brilliant Violet-486 | B56        | BD        | Proliferation              |

### Mixed/myeloid panel

| #  | marker/reagent   | fluorophore          | clone    | source |                              |
|----|------------------|----------------------|----------|--------|------------------------------|
| 1  | FVS700           | -                    | -        | BD     |                              |
| -  | human Fc block   | -                    | -        | BD     |                              |
| 2  | CD3              | Brilliant Violet-786 | UCHT1    | BD     | Total T-cells                |
| 3  | CD14             | Brilliant Violet-650 | M5E2     | BD     | Monocyte subset macrophage   |
| 4  | CD19             | Brilliant Violet-711 | SJ25C1   | BD     | Total B-cells                |
| 5  | CD16             | APC-H7               | 3G8      | BD     | Neutrophils                  |
| 6  | CD56             | PE-Cy5               | B159     | BD     | NKT cells, T-cell subsets    |
| 7  | CD11c            | Brilliant Violet-480 | B-ly6    | BD     | Monocytes, macrophages, Dc's |
| 8  | HLA-DR           | Brilliant Violet-605 | G46-6    | BD     | Antigen presentation         |
| 9  | CD27             | Brilliant Violet-421 | M-T271   | BD     | Maturation                   |
| 10 | CD11b            | PE                   | ICRF44   | BD     | Monocyte, macrophages        |
| 11 | CD123            | PE-Cy7               | 7G3      | BD     | Plasmacytoid Dcs             |
| 12 | CD141            | APC                  | 1A4      | BD     | Myeloid Dcs (cDC1)           |
| 13 | CD1c             | Brilliant Blue-515   | F10/21A3 | BD     | Myeloid Dcs (cDC2)           |
| 14 | CD15             | Brilliant UV-395     | HI-98    | BD     | Neutrophils                  |
| 15 | CD244            | PE-CF594             | 2B4      | BD     | NK cell, Dcs, MDSCs          |
| -  | 2% pfa/FC buffer | -                    | -        |        |                              |

### Intracellular cytokines panel

| #  | marker/reagent       | fluorophore          | clone     | source    |                              |
|----|----------------------|----------------------|-----------|-----------|------------------------------|
| 1  | FVS700               | -                    | -         | BD        |                              |
| -  | human Fc block       | -                    | -         | BD        |                              |
| 2  | CD3                  | Brilliant Violet-786 | UCHT1     | BD        | Total T-cells                |
| 3  | CD4                  | Brilliant UV-737     | SK3       | BD        | CD4+ T-cells                 |
| 4  | CD8a                 | Brilliant UV-395     | RPA-T8    | BD        | CD8+ T-cells                 |
| 5  | CD14                 | Brilliant Violet-650 | M5E2      | BD        | Monocyte subset macrophage   |
| 6  | CD19                 | Brilliant Violet-711 | SJ25C1    | BD        | Total B-cells                |
| 7  | CD56                 | PE-Cy5               | B159      | BD        | NKT cells, T-cell subsets    |
| 8  | CD16                 | APC-H7               | 3G8       | BD        | Neutrophils                  |
| 9  | Va24Ja18             | Brilliant Violet-421 | 6B11      | BioLegend | TCR specific                 |
| 10 | CD11c                | Brilliant Violet-480 | B-ly6     | BD        | Monocytes, macrophages, Dc's |
| 11 | CD11b                | Brilliant Violet-605 | ICRF44    | BD        | Monocyte, macrophages        |
| 12 | Va7.2                | PE/Dazzle-594        | 3C10      | BioLegend | Mait cells                   |
| 13 | gdTCR                | PE-Cy7               | 11F2      | BD        | gd T-cells                   |
| -  | Cytofix buffer       | -                    | -         | BD        |                              |
| -  | Cytoperm/wash buffer | -                    | -         | BD        |                              |
| 14 | IL-2                 | PE                   | MQ1-17H12 | BD        | Cytokine                     |
| 15 | IFNg                 | APC                  | B27       | BD        | Cytokine                     |
| 16 | TNFa                 | FITC                 | MAB11     | BD        | Cytokine                     |

Note: PDL1 antibody M1H1 does not compete with durvalumab.

## D. Flow cytometry gating strategy

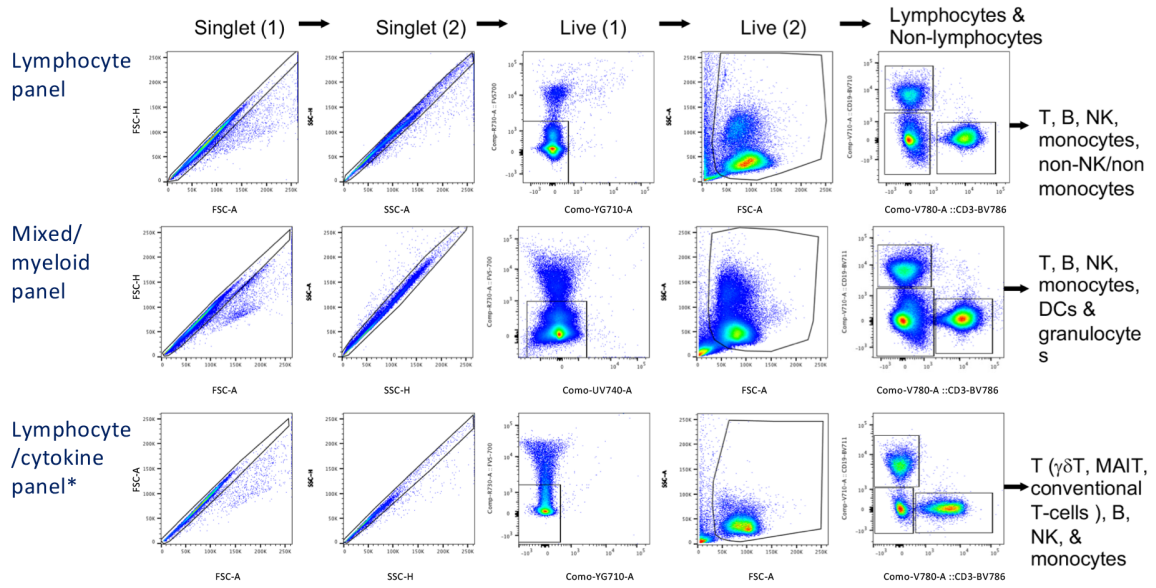

\* No stimulant + Golgi plug and 4 hr culture, or PMA + Ionomycin + Golgi plug and 4 hr culture,

Figure 1. Gating CD3 | CD19

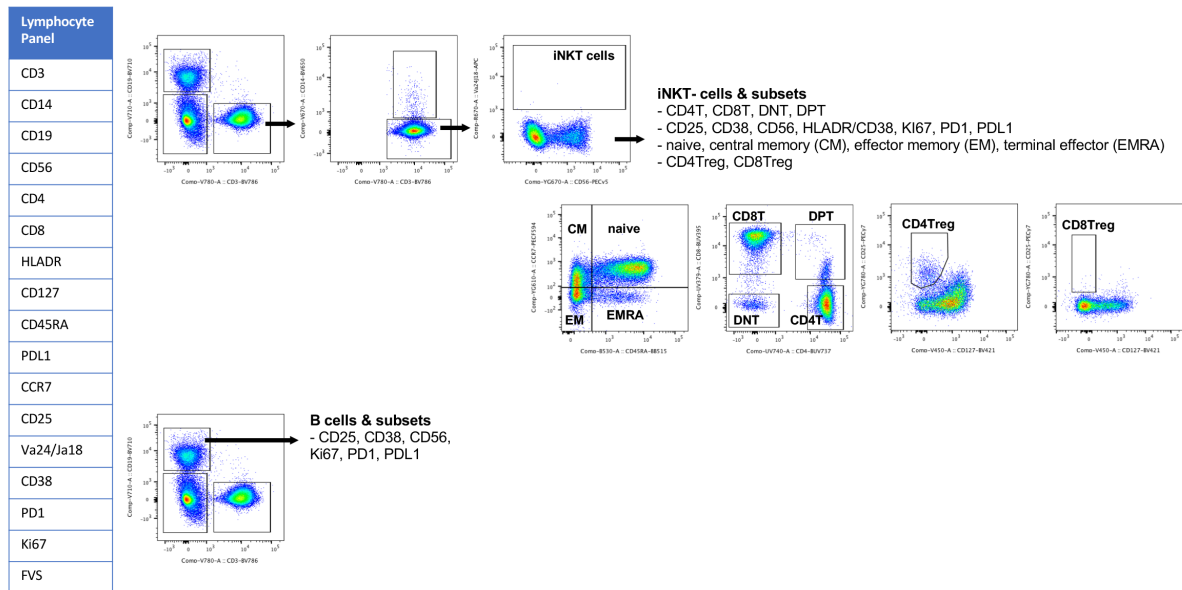

Figure 2. Gating T-cell panel from CD3 | CD19

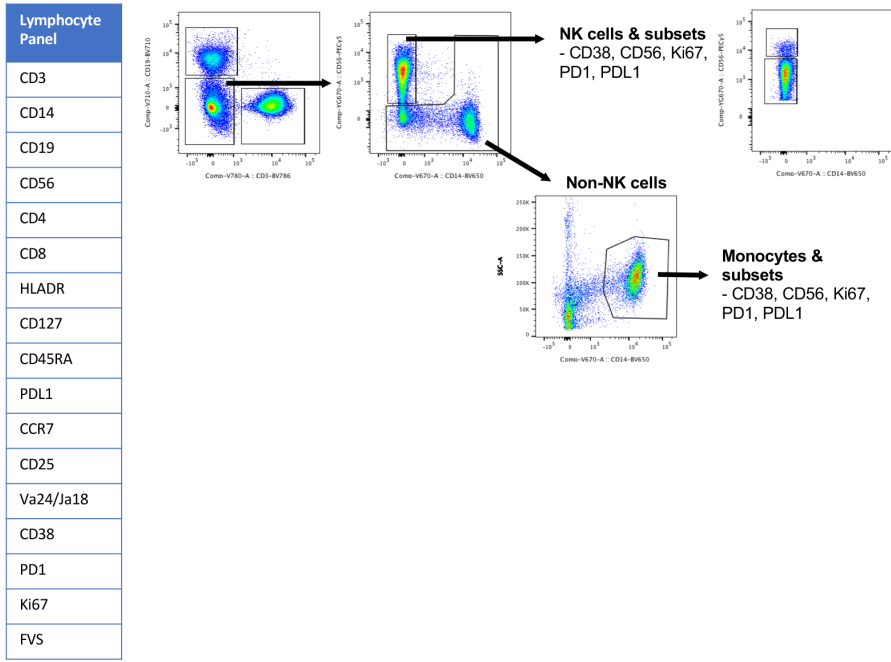

Figure 3. Gating NK cells and subsets

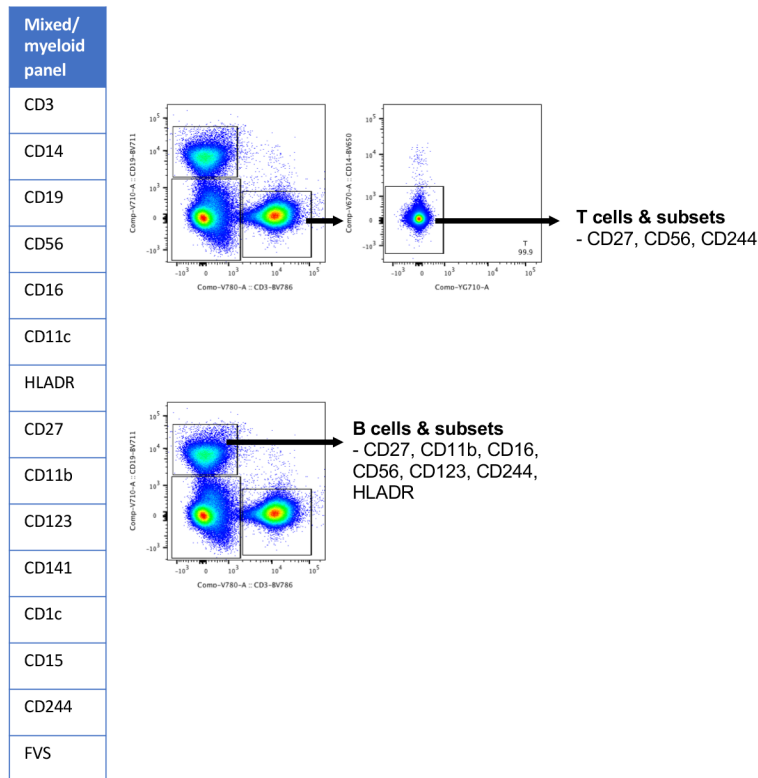

Figure 4. Gating mixed myeloid panel from CD3|CD19

| Mixed/<br>myeloid<br>panel |
|----------------------------|
| CD3                        |
| CD14                       |
| CD19                       |
| CD56                       |
| CD16                       |
| CD11c                      |
| HLADR                      |
| CD27                       |
| CD11b                      |
| CD123                      |
| CD141                      |
| CD1c                       |
| CD15                       |
| CD244                      |
| FVS                        |

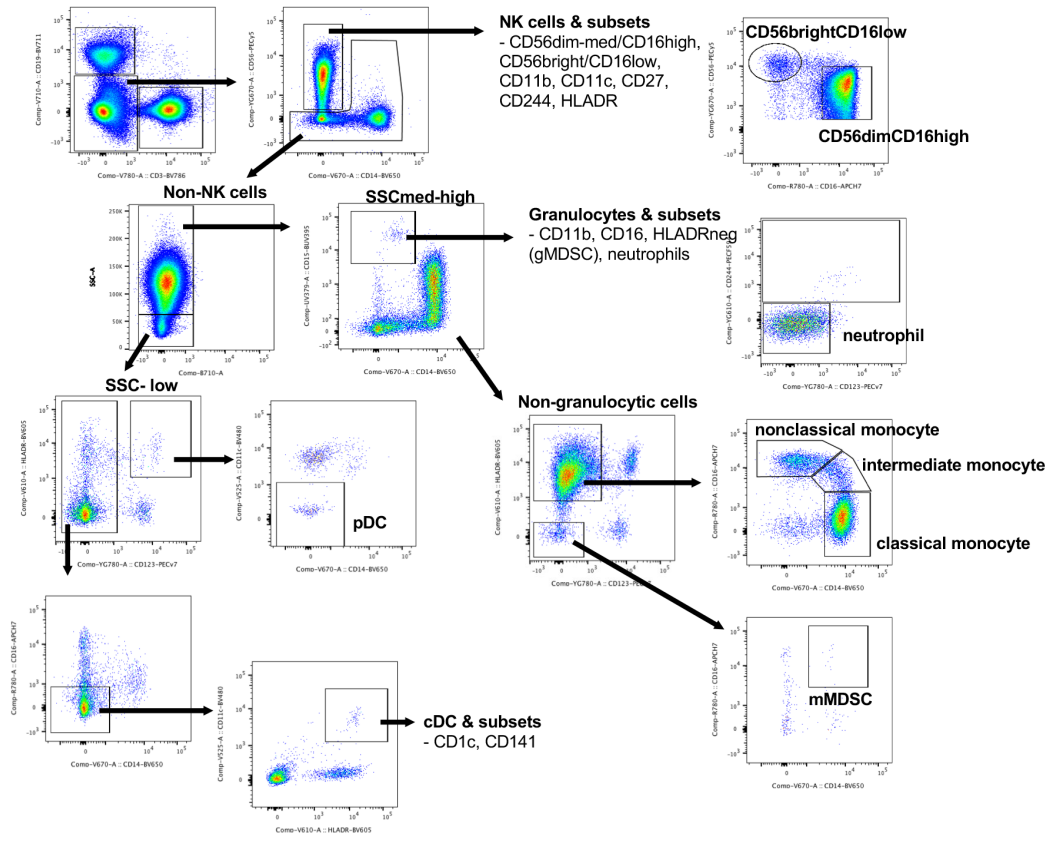

Figure 5. Gating subsets

| Cytokines (stimulated + resting cells) |
|----------------------------------------|
| CD3                                    |
| CD14                                   |
| CD19                                   |
| CD56                                   |
| CD4                                    |
| CD8                                    |
| <b>CD16</b>                            |
| Va24Ja18                               |
| CD11c                                  |
| CD11b                                  |
| Va7.2                                  |
| TCR $\gamma\delta$                     |
| IL2                                    |
| IFN $\gamma$                           |
| TNF $\alpha$                           |
| FVS                                    |

CD16 is shed w/ stimulation & is excluded

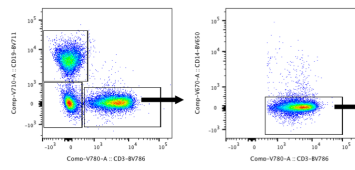

**T-cells & subsets**  
 - CD4T, CD8T, DNT, DPT  
 - MAIT,  $\gamma\delta$  T, iNKT, conventional T  
 - IFN $\gamma$ , IL2, TNF $\alpha$

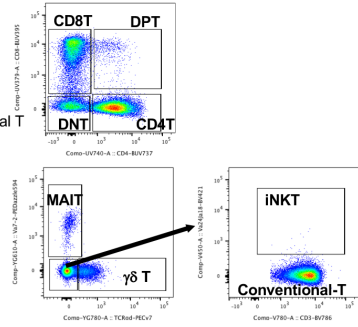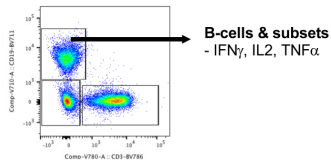

**B-cells & subsets**  
 - IFN $\gamma$ , IL2, TNF $\alpha$

| Cytokines (stimulated + resting cells) |
|----------------------------------------|
| CD3                                    |
| CD14                                   |
| CD19                                   |
| CD56                                   |
| CD4                                    |
| CD8                                    |
| <b>CD16</b>                            |
| Va24Ja18                               |
| CD11c                                  |
| CD11b                                  |
| Va7.2                                  |
| TCR $\gamma\delta$                     |
| IL2                                    |
| IFN $\gamma$                           |
| TNF $\alpha$                           |
| FVS                                    |

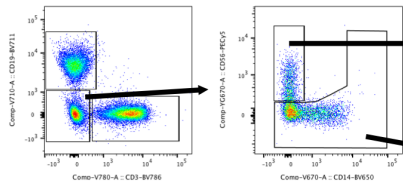

**NK cells & subsets**  
 - IFN $\gamma$ , IL2, TNF $\alpha$   
 - CD56brightCD16low, CD56dim-medCD16high

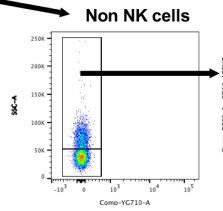

**SSC med-high**

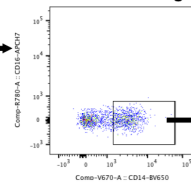

**Monocytes & subsets**  
 - IFN $\gamma$ , IL2, TNF $\alpha$

Figure 6. Cytokine/stimulated resting panel



## Appendix 2. Patient disposition for MoST screening to trial enrollment

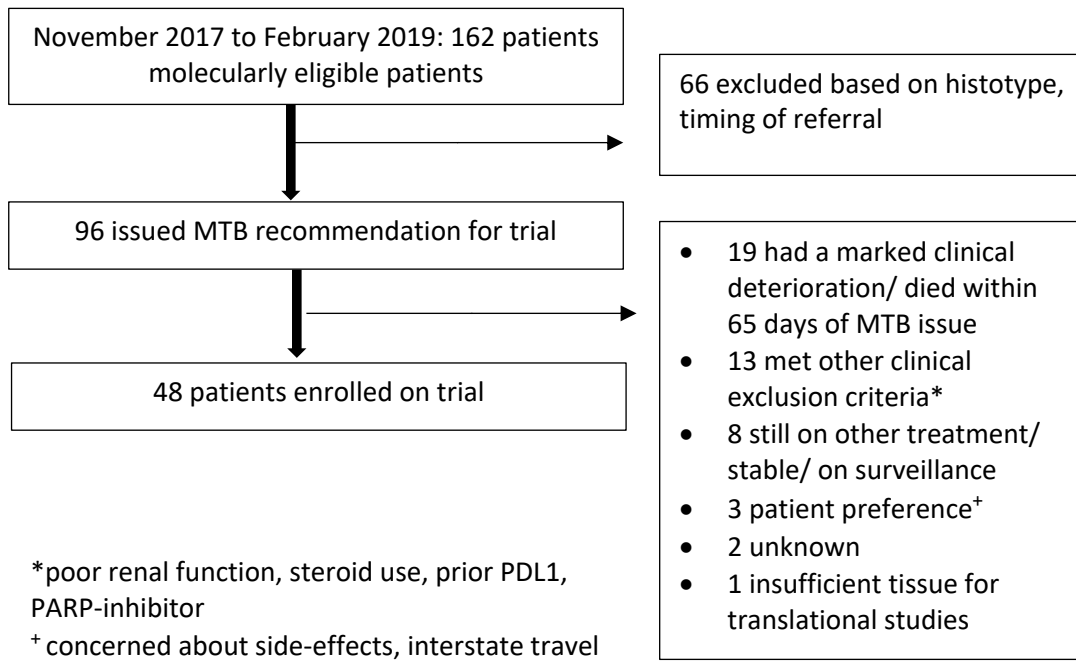

Appendix 3. Details of time to progression (TTP) prior to treatment and calculated TTP ratios

| Patient ID     | TTP1    | TTP2 (on trial) | TTP2/TTP1 ratio | Prior treatment details                                                                               |
|----------------|---------|-----------------|-----------------|-------------------------------------------------------------------------------------------------------|
| <b>Group 1</b> |         |                 |                 |                                                                                                       |
| D003           | 4.07    | 2.13            | 0.52            | <b>adjuvant</b> cisplatin + doxorubicin                                                               |
| D012           | 5.90    | 4.33            | 0.73            | pazopanib                                                                                             |
| D018           | 16.27   | 33.80           | 2.08            | <b>adjuvant</b> cisplatin + gemcitabine                                                               |
| D019           | 2.97    | 3.57            | 1.20            | taxol                                                                                                 |
| D026           | 3.53    | 14.50           | 4.10            | Carboplatin + paclitaxel + avastin                                                                    |
| D038           | 3.07    | 0.67            | 0.22            | palbociclib                                                                                           |
| D040           | 6.17    | 10.03           | 1.63            | irinotecan + Temozolomide                                                                             |
| D041           | 1.00    | 7.47            | 7.47            | gemcitabine (maintenance)                                                                             |
| D042           | 8.67    | 0.23            | 0.03            | temozolamide                                                                                          |
| D043           | 13.00   | 1.80            | 0.14            | FOLFIRI                                                                                               |
| D044           | 3.30    | 2.60            | 0.79            | doxorubicin                                                                                           |
| D045           | 1.87    | 3.70            | 1.98            | FOLFIRI + Bevacizumab                                                                                 |
| D046           | 4.80    | 1.80            | 0.38            | FOLFIRINOX                                                                                            |
| D047           | 15.17   | 22.60           | 1.49            | FOLFOXIRI                                                                                             |
| D048           | 1.07    | 3.90            | 3.66            | <b>adjuvant</b> carboplatin + paclitaxel                                                              |
| D049           | 2.33    | 0.53            | 0.23            | Cisplatin + Gemcitabine                                                                               |
| <b>Group 2</b> |         |                 |                 |                                                                                                       |
| D001           |         | 9.13            |                 | <b>no prior treatment</b>                                                                             |
| D002           | 4.43333 | 5.47            | 1.23            | <b>adjuvant</b> oxaliplatin, capecitabine / F-FU alternating IV avastin and IT cytarabine + etoposide |
| D006           | 8.06667 | 3.43            | 0.43            |                                                                                                       |
| D007           | 2.66667 | 35.87           | 13.45           | Zometa, Zoladex & Aromasin                                                                            |
| D008           | 4       | 12.10           | 3.03            | gemcitabine                                                                                           |
| D011           | 2.8     | 3.57            | 1.27            | Votrient                                                                                              |
| D013           |         | 10.70           |                 | carboplatin+paclitaxel x 3 cycles                                                                     |
| D015           | 2.03333 | 3.47            | 1.70            | raltitrexed                                                                                           |
| D016           | 6.06667 | 3.60            | 0.59            | procarbazine + lomustine + vincristine                                                                |
| D017           | 12.1667 | 17.97           | 1.48            | CDE clinical trial                                                                                    |
| D020           | 24.3667 | 3.67            | 0.15            | Cediranib                                                                                             |
| D021           | 1.16667 | 16.13           | 13.83           | cetuximab                                                                                             |
| D023           |         | 4.47            |                 | Avastin                                                                                               |
| D024           | 3.33333 | 3.63            | 1.09            | palbociclib                                                                                           |
| D027           | 5.86667 | 6.73            | 1.15            | FOLFOX                                                                                                |
| D029           | 1.7     | 30.57           | 17.98           | <b>adjuvant</b> carboplatn + pacli x 6 cycles                                                         |
| D030           | 5.1     | 30.30           | 5.94            | carboplatin + paclitaxel                                                                              |
| D032           | 19.2333 | 7.17            | 0.37            | cisplatin + Doxorubicin + Cycophosphamide                                                             |
| D033           | 4.9     | 8.20            | 1.67            | palbociclib + Letrazole                                                                               |
| D034           | 7.83333 | 12.87           | 1.64            | paclitaxel                                                                                            |
| D037           | 5.8     | 28.43           | 4.90            | <b>adjuvant</b> cisplatin + doxorubicin + HD-MTX                                                      |
| D004           | 0.53333 | 1.53            | 2.88            | TAC                                                                                                   |
| D005           | 4.96667 | 1.60            | 0.32            | temozolomide                                                                                          |
| D009           | 7.53333 | 1.60            | 0.21            | LXS196 a protein Kinase C                                                                             |
| D010           | 3.5     | 1.67            | 0.48            | FOLFOX                                                                                                |

|      |         |      |      |                                                  |
|------|---------|------|------|--------------------------------------------------|
| D014 | 8.4     | 1.63 | 0.19 | FOLFIRI                                          |
| D022 | 3.06667 | 1.67 | 0.54 | letrozole                                        |
| D025 | 3.73333 | 1.90 | 0.51 | eribulin                                         |
| D031 | 1.36667 | 1.70 | 1.24 | cisplatin + etoposide                            |
| D035 | 4.2     | 1.80 | 0.43 | lenvatinib                                       |
| D036 | 6.86667 | 1.73 | 0.25 | liposomal irinotecan + 5-fluorouracil (4 cycles) |
| D039 | 24.8667 | 1.70 | 0.07 | dendritic cell + NKC immunotherapy trial         |

Appendix 4A. Adjudicated SAEs related to any substudy treatment (definitely, probably, possibly)

| Patient ID | System Organ Class         | Event term          | Grade | Start date - end date | Related/ expected olaparib* | Related/expected durvalumab* |
|------------|----------------------------|---------------------|-------|-----------------------|-----------------------------|------------------------------|
| D015       | Blood disorders            | anemia              | 3     | 28/02-02/03           | related/ expected           | unrelated / -                |
|            | Blood disorders            | anemia              | 4     | 01/05-03/05           | related/ expected           | unrelated / -                |
| D021       | Renal disorders            | acute kidney injury | 3     | 01/07-06/07           | related /expected           | unrelated / -                |
|            | Renal disorders            | acute renal failure | 3     | 21/01-23/01           | related /expected           | related /expected            |
| D025       | Gastrointestinal disorders | abdominal pain      | 3     | 15/04-19/04           | related /expected           | unrelated / -                |

SAEs – serious adverse events. Note: ‘-/-’ & ‘-/-’ indicates not possible to specify relatedness.

Appendix 4B. Listing adjudicated SAEs unrelated to any substudy treatment (unlikely, not related)

| Patient ID | System Organ Class                               | Event term                          | Grade | Start date - End date   | Related/Expected Olaparib * | Related/Expected Durvalumab * |
|------------|--------------------------------------------------|-------------------------------------|-------|-------------------------|-----------------------------|-------------------------------|
| D008       | Metabolism disorders                             | Hyperglycemia                       | 3     | 22/11/2018 - 25/11/2018 | - / -                       | - / -                         |
| D010       | Infections and infestations                      | Lung infection                      | 3     | 22/01/2018 - 29/01/2018 | - / -                       | - / -                         |
|            | Gastrointestinal disorders                       | Pancreatitis                        | 3     | 01/02/2018 - 08/02/2018 | - / -                       | - / -                         |
| D018       | Renal and urinary disorders                      | Hematuria                           | 3     | 09/01/2019 - 10/01/2019 | - / -                       | - / -                         |
|            | Vascular disorders                               | Hypotension                         | 3     | 03/04/2019 - 05/04/2019 | - / -                       | - / -                         |
| D021       | Investigations                                   | Alanine aminotransferase increased  | 4     | 07/06/2019 -            | - / -                       | - / -                         |
| D024       | Respiratory, thoracic, and mediastinal disorders | Other: Community Acquired Pneumonia | 4     | 29/05/2018 - 06/06/2018 | - / -                       | - / -                         |
| D032       | Gastrointestinal disorders                       | Colonic perforation                 | 3     | 26/11/2018 - 21/12/2018 | - / -                       | - / -                         |
| D041       | Eye disorders                                    | Blurred vision                      | 3     | 19/11/2018 - 20/11/2018 | - / -                       | - / -                         |
| D049       | Infections and infestations                      | Sepsis                              | 5     | 02/03/2019 -            | - / -                       | - / -                         |

SAEs – serious adverse events. Note: ‘-/-’ & ‘-/-’ indicates not possible to specify relatedness.

## Appendix 5. Confirmed germline alterations

| Patient ID | Cancer type                 | Gene with germline variant | ClinVar                                          |
|------------|-----------------------------|----------------------------|--------------------------------------------------|
| D025       | Myxoid liposarcoma          | <i>NBN</i>                 | pathogenic                                       |
| D032       | Breast, IDC                 | <i>ATM</i>                 | pathogenic                                       |
| D034       | Papillary thyroid carcinoma | <i>ATM, NBN</i>            | likely pathogenic, pathogenic/ likely pathogenic |
| D035       | Pancreas adenocarcinoma     | <i>ATM</i>                 | pathogenic                                       |
| D041       | Glioma                      | <i>BRCA2 c.5909C&gt;A</i>  | pathogenic                                       |
| D045       | Pancreas adenocarcinoma     | <i>BRCA2 c.7975A&gt;G</i>  | pathogenic                                       |
| D046       | Rectal adenocarcinoma       | <i>BRCA2 c.7988A&gt;T</i>  | pathogenic                                       |
| D048       | Pancreas adenocarcinoma     | <i>BRCA2 c.5238dupT</i>    | pathogenic                                       |

IDC – infiltrating ductal carcinoma

## Appendix 6 – Forest plots

### 6A. Forest plot of progression-free survival for biological and clinical factors by group

Group 1

Group 2

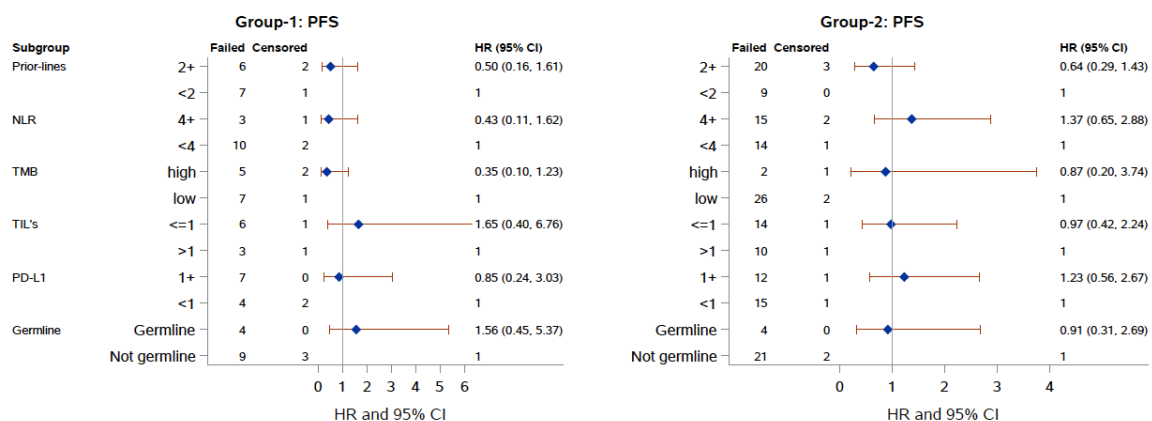

**Group 1 – Patients with BRCA1/2 alterations. Group 2 – Patients with other homologous recombination repair (HRR) alterations.** None of the clinical factors examined – number of prior lines of therapy, NLR, TMB, TILs, PDL-1 status or germline versus somatic demonstrated a significant difference in PFS. Abbreviations: CI – confidence interval, HR – hazard ratio for death, NLR – neutrophil-lymphocyte ratio, PFS – progression-free survival, TILs – tumour infiltrating lymphocytes, TMB – tumour mutational burden.

## 6B. Forest plot of overall survival for biological and clinical factors by group

Group 1

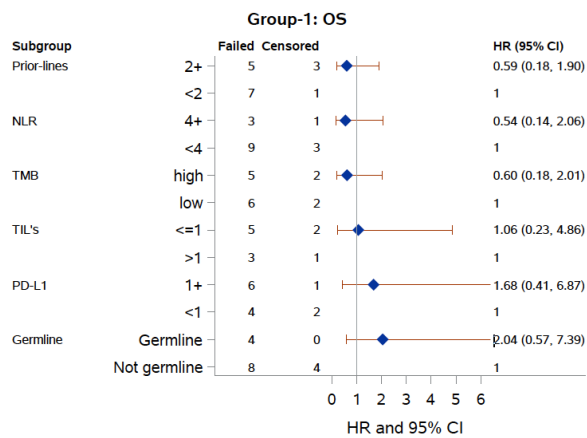

Group 2

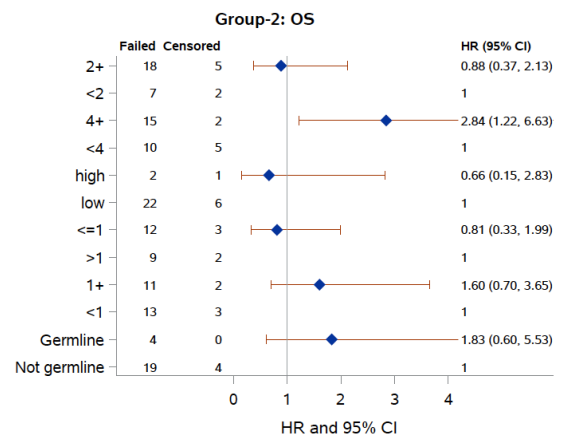

**Group 1 – Patients with BRCA1/2 alterations. Group 2 – Patients with other homologous recombination repair (HRR) alterations.** Most clinical factors examined – number of prior lines of therapy, TMB, TILs, PDL-1 status or germline versus somatic demonstrated no significant difference in OS. Only a high NLR  $\geq 4$  in group 2 was associated with a worse OS. Abbreviations: CI – confidence interval, HR – hazard ratio for death, NLR – neutrophil-lymphocyte ratio, OS – overall survival, TILs – tumour infiltrating lymphocytes, TMB – tumour mutational burden.

## 6C. Forest plot of progression-free survival and overall survival for biological and clinical factors for the overall trial population

Progression-free survival

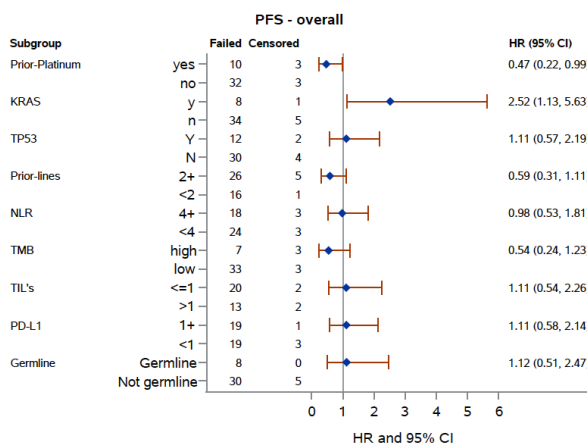

Overall survival

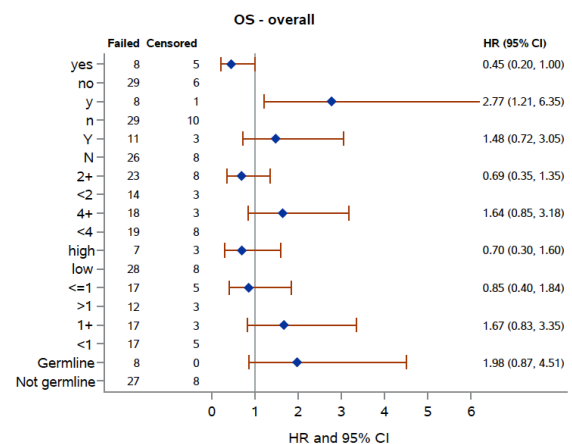

Progression-free and overall survival for the overall trial population, including both groups (*BRCA1/2* as well as patients with other *HRR alterations*). The presence of a *KRAS* mutation was associated with a worse progression-free and overall survival. Abbreviations: CI – confidence interval, HR – hazard ratio for death, NLR – neutrophil-lymphocyte ratio, OS – overall survival, PFS – progression-free survival, TILs – tumour infiltrating lymphocytes, TMB – tumour mutational burden.

## Appendix 7

Table 7A. Flow cytometry data, immune cell subsets at baseline, week 4 and 8 that were associated with good responders (durable response is  $\geq 2$  years OS and  $\geq 6$  months PFS) versus poor responders

| PBMC phenotype                            | Defining markers                                                      | Observation | Fold Change | P-value |
|-------------------------------------------|-----------------------------------------------------------------------|-------------|-------------|---------|
| <b>Week 0 (Baseline)</b>                  |                                                                       |             |             |         |
| [ConvTl T cell all] IFN $\gamma$ +        | CD3+CD19- CD14-> Va7.2- TCR $\gamma\delta$ - Va24Ja18- IFN $\gamma$ + | more        | 1.25        | 0.154   |
| [CD8+ T-cell all]/IFN $\gamma$ +          | CD3+CD19- CD14- > CD4-CD8+> IFN $\gamma$ +                            | more        | 1.45        | 0.135   |
| [ConvT CD8+ T-cell]+ IFN $\gamma$ +/all * | CD3+CD19- CD14- > CD4-CD8+> Va7.2- TCRgd- Va24Ja18- IFN $\gamma$ +    | more        | 1.51        | 0.154   |
| [ $\gamma\delta$ T-cells] CD4+            | CD3+CD19- CD14- > Va7.2- TCR $\gamma\delta$ +> CD4+                   | less        | 0.55        | 0.135   |
| [ $\gamma\delta$ T-cells] IL2+            | CD3+CD19- CD14- > Va7.2- TCR $\gamma\delta$ +> IL2+                   | less        | 0.44        | 0.135   |
| B-cell CD38+                              | CD3-CD19+> CD38+                                                      | more        | 1.49        | 0.0935  |
| B-cell CD38+ high                         | CD3-CD19+> CD38high                                                   | more        | 2.59        | 0.0385  |
| NK cells/all                              | CD3-CD19- CD56+CD14-                                                  | less        | 0.61        | 0.135   |
| NK all CD56dim CD16high NK/all            | CD3-CD19- CD56+CD14-> CD56dim CD16high                                | less        | 0.54        | 0.135   |
| NK all CD16+                              | CD3-CD19- CD56+CD14-> CD16+                                           | less        | 0.54        | 0.135   |
| [NK] TNF $\alpha$ +                       | CD3-CD19- CD56+CD14-TNF $\alpha$ +                                    | less        | 0.45        | 0.137   |
| Central memory DNT                        | T-cell > CD4-CD8- > CD45RA-CCR7+                                      | more        | 3.28        | 0.145   |
| DPT Ki67+                                 | CD3+CD19- CD14 > CD4+CD8+> Ki67+                                      | less        | 0.52        | 0.135   |
| DPT all CD25+CD56+                        | CD3+CD19- CD14-> CD4+CD8+> CD25+ CD56+                                |             | 0.23        | 0.135   |
| <b>Week 4 (+ olaparib)</b>                |                                                                       |             |             |         |
| Exhausted T-cell                          | CD3+CD19- CD14-> CD244low-med/T                                       | less        | 0.62        | 0.201   |
| [All T-cells] IL-2+                       | CD3+CD19- CD14-> IL-2+                                                | more        | 1.04        | 0.201   |
| T-cell CD4+ activated                     | CD3+CD19- CD14- > not-iNKT > CD4+CD8-> CD38+, > Ki67+                 | more        | 1.48        | 0.201   |
| [ $\gamma\delta$ T-cells] TNF $\alpha$ +  | CD3+CD19- CD14- > Va7.2- TCR $\gamma\delta$ + TNF $\alpha$ +          | more        | 1.56        | 0.201   |
| B-cell CD38+                              | CD3-CD19+> CD38+                                                      | more        | 1.35        | 0.201   |
| B-cell CD38+ high                         | CD3-CD19+> CD38high                                                   | more        | 2.07        | 0.201   |
| DNT cells CD56+                           | CD3+CD19- CD14-> CD4-CD8-CD56+                                        | less        | 0.47        | 0.201   |
| DPT cells CD25+                           | CD3+CD19- CD14-> CD4-CD8-CD25+                                        | more        | 1.41        | 0.201   |
| Monocytes All                             | CD3-CD19- SSCmed-high CD123-HLADR+                                    | less        | 0.72        | 0.201   |
| All classical monocytes                   | CD3-CD19- SSCmed-high CD123-HLADR+ >CD14+CD16-                        | less        | 0.7         | 0.201   |
| <b>Week 8 (+olaparib and durvalumab)</b>  |                                                                       |             |             |         |
| All T-cells IFN $\gamma$ +                | CD3+CD19- CD14-> IFN $\gamma$ +                                       | more        | 3.2         | 0.112   |
| All T-cells TNF $\alpha$ +                | CD3+CD19- CD14-> TNF $\alpha$ +                                       | more        | 8.6         | 0.124   |
| Activated CD8+ cells T-reg                | CD8+ T cell > CD25+CD127-> Ki67+                                      | more        | 1.89        | 0.112   |
| B-cell CD38+                              | CD3-CD19+> CD38+                                                      | more        | 1.33        | 0.112   |
| B-cell CD38+ high all                     | CD3-CD19+> CD38high                                                   | more        | 3.01        | 0.112   |
| NK TNF $\alpha$ +                         | CD3-CD19- CD56+CD14-TNF $\alpha$ +                                    | more        | 2.89        | 0.112   |
| DNT cells CD56+                           | CD3+CD19- CD14-> CD4-CD8-CD56+                                        | less        | 0.508       | 0.112   |
| Monocytes HLA DR high                     | CD3-CD19- SSCmed-high CD123-HLADR+                                    | more        | 1.88        | 0.112   |
| All Neutrophils                           | CD3-CD19- SSCmed-high CD15highCD14-> CD244- CD123-                    | less        | 0.69        | 0.112   |

Evaluative samples week 0 (9 good/29 poor), week 4 (8 good/28 poor), week 8 (8 good/ 21 poor). Only immune cell populations that were significant using Mann Whitney U test ( $P \leq 0.05$ ) are shown. Furthermore, *P-values* have been adjusted using the Benjamini-Hochberg method for multiple test correction(). [ ] denotes panel 3 where cells were primed with PMA and ionomycin.

Table 7B. Immune cell subsets that were associated with better overall survival and/or progression free survival at each timepoint

| <b>PBMC phenotype</b>                            | <b>Defining markers</b>                             | <b>OS</b> | <b>P-value</b> | <b>PFS</b> | <b>P-value</b> |
|--------------------------------------------------|-----------------------------------------------------|-----------|----------------|------------|----------------|
| <b><u>Week 0 (Baseline)</u></b>                  |                                                     |           |                |            |                |
| All T-cells                                      | CD3+CD19- CD14-                                     | more      | 0.0013         |            |                |
| [ $\gamma\delta$ T-cells] IL2+                   | CD3+CD19- CD14- > Va7.2- TCR $\gamma\delta$ +> IL2+ | less      | 0.0053         | less       | 0.0006         |
| B-cell CD38+                                     | CD3-CD19+> CD38+                                    | more      | 0.004          | more       | 0.0006         |
| B-cell CD38+ high                                | CD3-CD19+> CD38high                                 | more      | 0.0077         | more       | 0.0003         |
| B-cell PD-L1+                                    | CD3-CD19+> PD-L1+                                   | more      | 0.008          | more       | 0.0002         |
| [NK] TNF $\alpha$ +                              | CD3-CD19- CD56+CD14-TNF $\alpha$ +                  | less      | 0.0013         | less       | 0.0005         |
| DPT all CD25+CD56+                               | CD3+CD19- CD14-> CD4+CD8+> CD25+ CD56+              |           |                | less       | 0.0053         |
| <b><u>Week 4 (+ olaparib)</u></b>                |                                                     |           |                |            |                |
| [All T-cells] IL-2+                              | CD3+CD19- CD14-> IL-2+                              | more      | 0.0006         |            |                |
| [ $\gamma\delta$ T-cells] IL2+                   | CD3+CD19- CD14- > Va7.2- TCR $\gamma\delta$ +> IL2+ |           |                | less       | 0.0275         |
| <b><u>Week 4 (+ olaparib and durvalumab)</u></b> |                                                     |           |                |            |                |
| All B-cells                                      | CD3-CD19+                                           | more      | 0.0055         |            |                |
| B-cell CD38+ high                                | CD3-CD19+> CD38high                                 | more      | 0.0165         |            |                |
| Monocytes HLA DR high                            | CD3-CD19- SSCmed-high CD123-HLADR+                  | more      | 0.0311         |            |                |

Differences in survival were calculated by Mantel Cox rank test. *P-values* from higher  $\geq$  median levels of immune subsets. Furthermore, *P-values* that survived multiple comparisons using the Benjamini-Hochberg method, (adjusted *P-values*) are shown. [ ] denotes panel 3 where cells were primed with PMA and ionomycin.



Appendix 8. Comparative analysis of immune cell populations following treatment with olaparib at week 4.

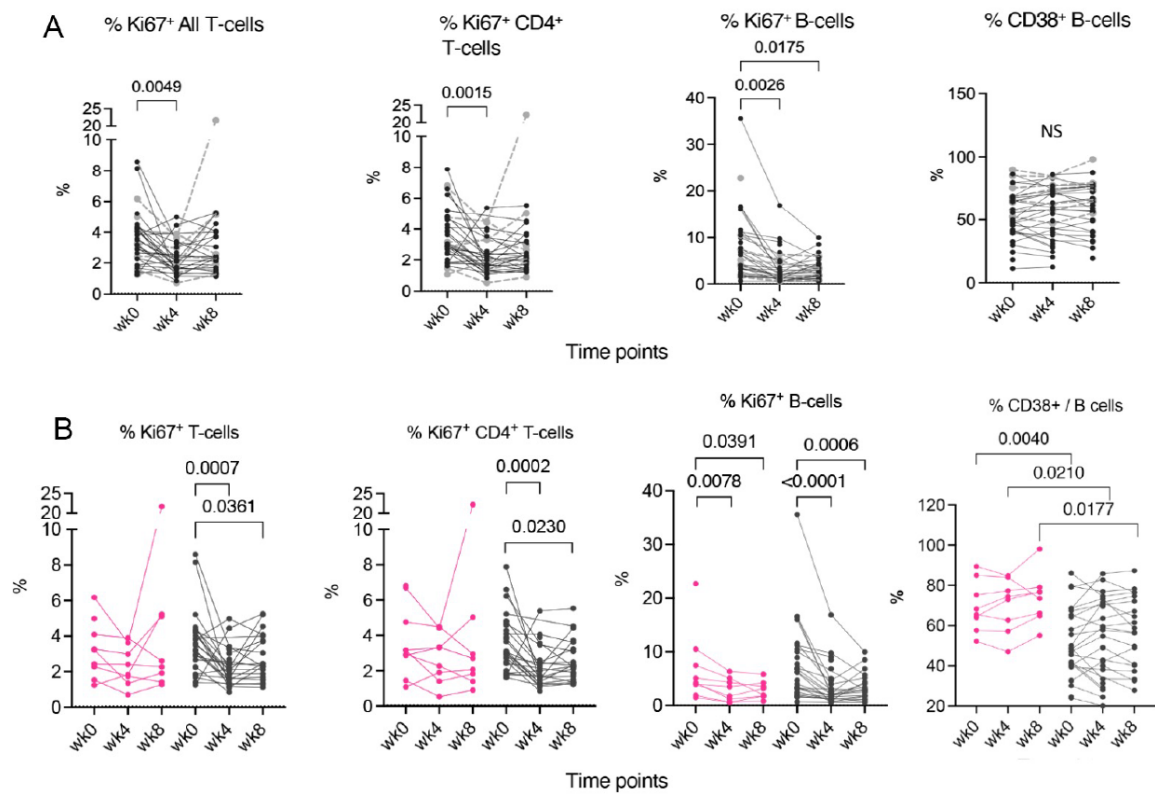

Fig 8. Comparative analysis of immune cell populations following treatment with olaparib at week 4

- Showing lymphoid populations that significantly changed from baseline to week 4 in all patients, with the exception of CD38+ B cells.
- Analysis of populations segregated into good responders (pink) and poor responders. Kruskal-Wallis test was conducted for multiple comparisons.

Appendix 9A. Comparison of immune cell phenotype in patients with BRCA1/2 versus all other HRR alterations at baseline and at week 4 following olaparib.

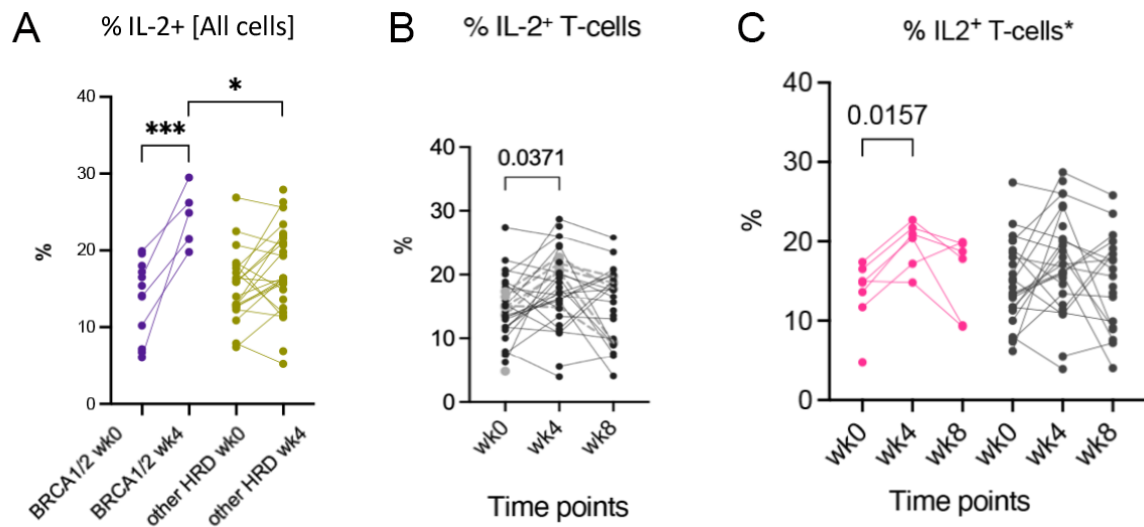

Figure 9A. Single live cells shown. B) increased IL-2 expression seen at week 4 following olaparib. C) demonstrates correlation with good responders.

Appendix 9B. Comparative analysis of immune cell populations following treatment with both olaparib and durvalumab at week 8.

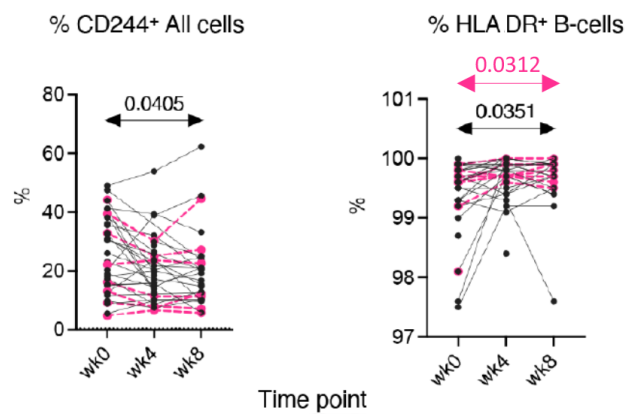

Figure 9B Showing immune cell populations that most significantly changed after O+D at 8 weeks (black lines), Good responders are shown in pink. Kruskal-Wallis test was conducted for multiple comparisons.
